# Supplementary material for: Characterization of CcTFL1 Governing Plant Architecture in Pigeon pea (Cajanus cajan (L.) Millsp.)
Source: MDPI journal article supplement (doi:10.3390/plants12112168), 2023-05-30
Supplement: s1 [file s1]

## Supplementary Information

### Complete characterization and validation of *CcTFLI* governing plant architecture in pigeonpea (*Cajanus cajan* (L.) Millsp.)

#### Authors and affiliations:

Isha Mendapara

Department of Genetics and Plant Breeding, N. M. College of Agriculture, Navsari Agricultural University, Navsari 396 450, Gujarat, India

Kaushal Modha\*

Department of Genetics and Plant Breeding, N. M. College of Agriculture, Navsari Agricultural University, Navsari 396 450, Gujarat, India

Sunayan Patel

Department of Genetics and Plant Breeding, College of Agriculture, Navsari Agricultural University Campus, Bharuch 392 012, Gujarat, India

Vipulkumar Parekh

Department of Basic Science and Humanities, College of Forestry, Navsari Agricultural University, Navsari 396 450, Gujarat, India

Ritesh Patel

Department of Genetics and Plant Breeding, N. M. College of Agriculture, Navsari Agricultural University, Navsari 396 450, Gujarat, India

Digvijay Chauhan

Pulses and Castor Research Station, Navsari Agricultural University, Navsari 396 450, Gujarat, India

Kirti Bardhan

Department of Basic Science and Humanities, College of Forestry, Navsari Agricultural University, Navsari 396 450, Gujarat, India

Manzer H Siddiqui

Department of Botany and Microbiology, College of Science, King Saud University, Riyadh, 11451, Saudi Arabia  
Saud Alamri

Department of Botany and Microbiology, College of Science, King Saud University, Riyadh, 11451, Saudi Arabia  
Md. Atikur Rahmane

Grassland & Forages Division, National Institute of Animal Science, Rural Development Administration, Cheonan, 330-801, Republic of Korea

#### >ON711024 [*Cajanus cajan*] determinate growth habit Genotype PADT 16 gene *CcTFLI* complete cds

```
CATTCTTCTCGCTGTCTTCCTTCTTCCTTATAATGGCAAGAATGCCTATAGAGCCTCTAATAGTG
GGAAGAGTCATAGGAGAAGTTCTTGATTCTTTCACCACATGACTGTGAGTTACAACAAGAAGCAA
GTCTACAATGGCCATGAGCTCTTCCCTTCCACTGTCAACACCATAACCAAGGTTGAGATTGATGGT
GGTGATATGAGGTCCTTCTTCACACTGGTATATATGTATCTCTTCTTATATTCCTTTTCTTTGAAGA
ACAAAGGGGTGAAAAAAGAAAAAATTAAGCTGTTTTCCAGTGTGTTTCGTTTGTGTTTTCTGTA
ATCATGCTCACACAATCACACTATATGCCTCTTTATTGGAGTTTTCTTCAAGAGTACTGAATCATT
```

AAGCTAAATGTCTCCCTTTTTTTGTGCACAGATCATGACAGACCCGGATGTTCTTGGCCCTAGTGATCC  
TTATCTGAGAGAGCACTTGCACTGGTACTCAATTATACCATCATTTTTAGTTTATTAAACATTGCTTA  
AATACTTAAGCTGTAACACTAAACTAACCATTTATAACATAAAAGAAAAACCCACCACACCACAT  
AGCCACTGGATTCTTTTAACAACCTCAACAAAATTTTTAAGATAATCATTTAAAAGTACTTAACTGTT  
TACCCATCTGACAATATTCACGTCAGATGTCTGTGTATTTTAAGCCTAATAGAAGTTTGAAGTTTAA  
CAAGATATATATGCATCCTTTTCATCACATCAAATTAACCACTGAAGTAAATGAAGAAGGTACATAT  
ATACATACCTTTAACTGTATTCTGTAAAAGTAGCACGTTCTACCAAATCCATCCACCCTAAAACCA  
AAACAATCTCAAAGGGTGAATAAATCTCGAAGTCTCAAACATAACATAATTAACGGTATATATAT  
GTAAGGTAAACTAGCCATTCATAGGTATCTAACAGTCAACAAATTTGTTGGAAATATTCTTTTTGC  
AGGATAGTGACAGATATTCCAGGCACAACAGATGCCACATTTGGTAGGTTTCATGTAAATGATTGGT  
ATATAAGGGAACTTTCAACTTACTACTGATGATGAGAGAGACTGACAAATATGATCTATCTTGCTG  
TTGTAGGGAAAGAGTTGGTGAGCTATGAGATCCCAAAGCCTAATATTGGGATCCATAGGTTTGTGT  
TTGTCCTGTTCAAGCAAAAGCGTAGGCAGTGTGTTACTCCACCTGCTTCAAGGGATCACTTCAACA  
CACGCAATTCGCCGCACAGAATGACCTTGGCCTCCCTGTGGCTGCTGTCTACTTCAATGCACAGA  
GGGAAACGGCTGCAAGAAGACGCTAGCGAGCATACTTGGTGATTGCATGCTGCACACTCAAG

**>ON711026 [*Cajanus cajan*] indeterminate growth habit Genotype BDN 711 gene *CcTFL1* complete cds**

CTTCTCTCTCTCTCTCTCTCTCTCTTATAATGGCAAGAATGCCTATAGAGCCTCTAATAGTGGG  
AAGAGTCATAGGAGAAGTTCTTGATTCTTTACCACAAGCATAAAAATGACTGTGAGTTACAACA  
AGAAGCAAGTCTACAATGGCCATGAGCTCTTCCCTTCCACTGTCAACACCATACCCAAGGTTGAGA  
TTGATGGTGGTGATATGAGGTCCCTTCTTCACACTGGTATATATGTATCTCTTCTTATATTCCCTTTTC  
TTTGAAGAACAAAGGGGTGAAAAAAAAGAAAAAATTAAGCTGTTTTCCAGTGTGTTCTGTTTGTTGT  
TTTCTGTAATCATGCTCACACAATCACACTATATGCCTCTTTTATTGGAGTTTTCTTCAAGAGTACT  
GAATCATTAAGCTAAATGTCTCCCTTTTTTGTGCACAGATCATGACAGACCCGGATGTTCCCTGGCCCT  
AGTGATCCTTATCTGAGAGAGCACTTGCCTGGTACTCAATTATACCATCATTTTAGTTTATTAAAC  
ATTGCTTAAATACTTAAGCTGTAACACTAACTAACCATTATATAACATAAAAGAAAAACCCACCAC  
ACCACATAGCCACTGGATTCTTTTAACAACCTCAACAAAAATTTTAAGATAATCATTTAAAAGTACT  
TAACTGTTTACCCATCTGACAATATTCACGTGAGATGTCTGTGTATTTTAAGCCTAATAGAAGTTTG  
AAGTTTTACAAGATATATATGCATCCTTTCATCACATCAAATTAACCACTGAAGTAAATGAAGAAG  
GTACATATATACATACCTTTAACTGTATTCTGTAAAAGTAGCACGTTCTACCAAATCCATCCACCCT  
AAAACCAAAACAATCTCAAAGGGTGAATAAATCTCGAAGTCTCAAACATAACATAATTAACGGTA  
TATATATGTAAGGTAACTAGCCATTTCATAGGTATCTAACAGTCAACAAATTTGTTGGAAATATTC  
TTTTTGCAGGATAGTGACAGATATTCCAGGCACAACAGATGCCACATTTGGTAGGTTTCATGTAAAT  
GATTGGTATATAAGGGAACTTTCACTTACTACTGATGATGAGAGAGACTGACAAATATGATCTAT  
CTTGCTGTTGTAGGGAAAGAGTTGGTGAGCTATGAGATCCCAAAGCCTAATATTGGGATCCATAGG  
TTTGTGTTTGTCTCTGTTCAAGCAAAAGCGTAGGCAGTGTGTTACTCCACCTGCTTCAAGGGATCACT  
TCAACACACGCAATTTGCGCGCACAGAATGACCTTGGCCTCCCTGTGGCTGCTGTCTACTTCAATG  
CACAGAGGGAAACGGCTGCAAGAAGACGCTAGCGAGCATACTTGGTGATTGCTTACTGC

[illegible]

GGTTTGTGTTTGTCTGTTCAAGCAAAAGCGTAGGCAGTGTGTTACTCCACCTGCTTCAAGGGATC  
ACTTCAACACACGCAATTTGCGCCGACAGAATGACCTTGGCCTCCCTGTGGCTGCTGTCTACTTCA  
ATGCACAGAGGGGAAACGGCTGCAAGAAGACGCTAGCGAGCATACTTGGTGATTGCTTCTGCA

>ON711028 [*Cajanus cajan*] indeterminate growth habit Genotype GT 104 gene *CcTFL1* complete cds  
GCTTCTTCTCGCTGTCTTACTTCTTCCTCTTATAATGGCAAGAATGCCTATAGAGCCTCTAATAGTG  
GGAAGAGTCATAGGAGAAGTTCTTGATTCTTTCACCACAAGCATAAAAAATGACTGTGAGTTACAA  
CAAGAAGCAAGTCTACAATGGCCATGAGCTCTTCCCTTCCACTGTCAACACCATAACCAAGGTTGA  
GATTGATGGTGGTGATATGAGGTCCTTCTTCACACTGGTATATATGTATCTCTTCTTATATTCCCTTT  
TCTTTGAAGAACAAAGGGGTGAAAAAAGAAAAAATTAAGCTGTTTTCCAGTGTGTTTCGTTTGT  
GTTTTCTGTAATCATGCTCACACAATCACACTATATGCCTCTTTTATTGGAGTTTTCTTCAAGAGTA  
CTGAATCATTAAAGCTAAATGTCTCCCTTTTTTGTACAGATCATGACAGACCCGGATGTTCTGGCC  
CTAGTGATCCTTATCTGAGAGAGCACTTGCCTGGTACTCAATTATACCATCATTTTAGTTTATTAA  
ACATTGCTTAAATACTTAAGCTGTAACTAACTAACTAACCATTATAACATAAAAGAAAAACCCACC  
ACACCACATAGCCACTGGATTCTTTTAACAACCTCAACAAAAATTTTAAGATAATCATTTAAAAGTA  
CTTAAGTGTTTACCCATCTGACAATATTCACGTCAGATGTCTGTGTATTTTAAGCCTAATAGAAGTT  
TGAAGTTTTACAAGATATATATGCATCCTTTCATCACATCAAATTAACCACTGAAGTAAATGAAGA  
AGGTACATATATACATACCTTTAACTGTATTCTGTAAAAGTAGCACGTTCTACCAAATCCATCCAC  
CCTAAAACCAAAACAATCTCAAAGGGTGAATAAATCTCGAAGTCTCAAACATAACATAATTAACG  
GTATATATATGTAAGGTAACTAGCCATTATAGGTATCTAACAGTCAACAAATTTGTTGGAAATA  
TTCTTTTTTGAGGATAGTGACAGATATTCAGGCACAACAGATGCCACATTTGGTAGGTTTCATGTA  
AATGATTGGTATATAAGGGAACCTTCACTTACTACTGATGATGAGAGAGACTGACAAATATGATC  
TATCTTGCTGTTGTAGGGAAGAGTTGGTGAGCTATGAGATCCCAAAGCCTAATATTGGGATCCAT  
AGGTTTGTGTTTGTCTGTTCAAGCAAAAGCGTAGGCAGTGTGTTACTCCACCTGCTTCAAGGGAT  
CACTTCAACACACGCAATTTGCGCCGACAGAATGACCTTGGCCTCCCTGTGGCTGCTGTCTACTTC  
AATGCACAGAGGGGAAACGGCTGCAAGAAGACGCTAGCGAGCATACTTGGTGATTGTATGCTGCAC  
A

>ON711029 [*Cajanus cajan*] indeterminate growth habit Genotype GT 105 gene *CcTFL1* complete cds  
CTTTCTTCTCTTCTTCTTCCTCTTATAATGGCAAGAATGCCTATAGAGCCTCTAATAGTGGG  
AAGAGTCATAGGAGAAGTTCTTGATTCTTTCACCACAAGCATAAAAAATGACTGTGAGTTACAACA  
AGAAGCAAGTCTACAATGGCCATGAGCTCTTCCCTTCCACTGTCAACACCATAACCAAGGTTGAGA  
TTGATGGTGGTGATATGAGGTCCTTCTTCACACTGGTATATATGTATCTCTTCTTATATTCCCTTTTC  
TTTGAAGAACAAAGGGGTGAAAAAAGAAAAAATTAAGCTGTTTTCCAGTGTGTTTCGTTTGTGT  
TTTCTGTAATCATGCTCACACAATCACACTATATGCCTCTTTTATTGGAGTTTTCTTCAAGAGTACT  
GAATCATTAAAGCTAAATGTCTCCCTTTTTTGTACAGATCATGACAGACCCGGATGTTCTGGCCCT  
AGTGATCCTTATCTGAGAGAGCACTTGCCTGGTACTCAATTATACCATCATTTTAGTTTATTAAAC  
ATTGCTTAAATACTTAAGCTGTAACTAACTAACCATTATAACATAAAAGAAAAACCCACCAC  
ACCACATAGCCACTGGATTCTTTTAACAACCTCAACAAAAATTTTAAGATAATCATTTAAAAGTACT  
TAACTGTTTACCCATCTGACAATATTCACGTCAGATGTCTGTGTATTTTAAGCCTAATAGAAGTTTG  
AAGTTTTACAAGATATATATGCATCCTTTCATCACATCAAATTAACCACTGAAGTAAATGAAGAAG

GTACATATATACATACCTTTAACTGTATTCTGTAAAAGTAGCACGTTCTACCAAATCCATCCACCCT  
AAAACCAAAACAATCTCAAAGGGTGAATAAATCTCGAAGTCTCAAACATAACATAATTAACGGTA  
TATATATGTAAGGTAACTAGCCATTCATAGGTATCTAACAGTCAACAAATTTGTTGGAAATATTC  
TTTTTGCAGGATAGTGACAGATATTCCAGGCACAACAGATGCCACATTTGGTAGGTTTCATGTAAAT  
GATTGGTATATAAGGGAACCTTTCAACTTACTACTGATGATGAGAGAGACTGACAAATATGATCTAT  
CTTGCTGTTGTAGGGAAAGAGTTGGTGAGCTATGAGATCCCAAAGCCTAATATTGGGATCCATAGG  
TTTGTGTTTGTCTGTTCAGCAAAAGCGTAGGCAGTGTGTTACTCCACCTGCTTCAAGGGATCACT  
TCAACACACGCAATTTGCGCCGCACAGAATGACCTTGGCCTCCCTGTGGCTGCTGTCTACTTCAATG  
CACAGAGGGAAACGGCTGCAAGAAGACGCTAGCGAGCATACTTGGTGATTGCTTCTGCAC

**>ON711014 [Cajanus cajan] determinate growth habit Genotype GT 100 gene CcTFL1 partial cds**

CCACATGACTGTGAGTTACAACAAGAAGCAAGTCTACAATGGCCATGAGCTCTTCCCTTCCACTGT  
CAACACCATAACCAAGGTTGAGATTGATGGTGGTGATATGAGGTCCTTCTTCACACTGGTATATAT  
GTATCTCTTCTTATATTCCCTTTTCTTTGAAGAACAAAGGGGTGAAAAAAGAAAAAATTAAGCT  
GTTTTCCAGTGTGTTTCGTTTGTGTTTTCTGTAATCATGCTCACACAATCACACTATATGCCTCTTTT  
ATTGGAGTTTTCTTCAAGAGTACTGAATCATTAAAGCTAAATGTCTCCCTTTTTTGTACAGATCATG  
ACAGACCCGGATGTTCCCTGGCCCTAGTGATCCTTATCTGAGAGAGCACTTGCACTGGTACTCAATT  
ATACCATCATTTTAGTTTTATTAAACATTGCTTAAATACTTAAGCTGTAACACTAAACTAACCATTTA  
TAACATAAAAGAAAAACCCACCACACCACATAGCCACTGGATTCTTTTAACAACTCAACAAAATTT  
TTAAGATAATCATTTAAAAGTACTTAACTGTTTACCCATCTGACAATATTCACGTCAGATGTCTGTG  
TATTTTAAGCCTAATAGAAGTTTGAAGTTTACAAGATATATATGCATCCTTTCATCACATCAAAA  
A

**> ON711015 [Cajanus cajan] determinate growth habit Genotype ICPL 87 gene CcTFL1 partial cds**

CCACATGACTGTGAGTTACAACAAGAAGCAAGTCTACAATGGCCATGAGCTCTTCCCTTCCACTGT  
CAACACCATAACCAAGGTTGAGATTGATGGTGGTGATATGAGGTCCTTCTTCACACTGGTATATAT  
GTATCTCTTCTTATATTCCCTTTTCTTTGAAGAACAAAGGGGTGAAAAAAGAAAAAATTAAGCT  
GTTTTCCAGTGTGTTTCGTTTGTGTTTTCTGTAATCATGCTCACACAATCACACTATATGCCTCTTTT  
ATTGGAGTTTTCTTCAAGAGTACTGAATCATTAAAGCTAAATGTCTCCCTTTTTTGTACAGATCATG  
ACAGACCCGGATGTTCCCTGGCCCTAGTGATCCTTATCTGAGAGAGCACTTGCACTGGTACTCAATT  
ATACCATCATTTTAGTTTTATTAAACATTGCTTAAATACTTAAGCTGTAACACTAAACTAACCATTTA  
TAACATAAAAGAAAAACCCACCACACCACATAGCCACTGGATTCTTTTAACAACTCAACAAAATTT  
TTAAGATAATCATTTAAAAGTACTTAACTGTTTACCCATCTGACAATATTCACGTCAGATGTCTGTG  
TATTTTAAGCCTAATAGAAGTTTGAAGTTTACAAGATATATATGCATCCTTTCATCAACATCAAA  
AA

**> ON711016 [Cajanus cajan] determinate growth habit Genotype AVPP 1 gene CcTFL1 partial cds**

CCACATGACTGTGAGTTACAACAAGAAGCAAGTCTACAATGGCCATGAGCTCTTCCCTTCCACTGT  
CAACACCATAACCAAGGTTGAGATTGATGGTGGTGATATGAGGTCCTTCTTCACACTGGTATATAT  
GTATCTCTTCTTATATTCCCTTTTCTTTGAAGAACAAAGGGGTGAAAAAAGAAAAAATTAAGCT  
GTTTTCCAGTGTGTTTCGTTTGTGTTTTCTGTAATCATGCTCACACAATCACACTATATGCCTCTTTT

ATTGGAGTTTTCTTCAAGAGTACTGAATCATTAAAGCTAAATGTCTCCCTTTTTTGTACAGATCATG  
ACAGACCCGGATGTTCCCTGGCCCTAGTGATCCTTATCTGAGAGAGCACTTGCACTGGTACTCAATT  
ATACCATCATTTTAGTTTTATTAAACATTGCTTAAATACTTAAGCTGTAACACTAACTAACCATTTA  
TAACATAAAAGAAAAACCCACCACACCACATAGCCACTGGATTCTTTTAACAACCTCAACAAAATTT  
TTAAGATAATCATTTAAAAGTACTTAACTGTTTACCCATCTGACAATATTCACGTCAGATGTCTGTG  
TATTTTAAGCCTAATAGAAGTTTGAAGTTTACAAGATATATATGCATCCTTTCATTCCACATCAAA  
AG

> **ON711017 [Cajanus cajan] determinate growth habit Genotype ICPL 20336 gene CcTFL1 partial cds**  
CCACATGACTGTGAGTTACAACAAGAAGCAAGTCTACAATGGCCATGAGCTCTTCCCTTCCACTGT  
CAACACCATAACCAAGGTTGAGATTGATGGTGGTGATATGAGGTCCTTCTTCACACTGGTATATAT  
GTATCTCTTCTTATATTCCCTTTTTCTTTGAAGAACAAGGGGTGAAAAAAGAAAAATTAAGCT  
GTTTTCCAGTGTGTTTCGTTTGTGTTTTCTGTAATCATGCTCACACAATCACACTATATGCCTCTTTT  
ATTGGAGTTTTCTTCAAGAGTACTGAATCATTAAAGCTAAATGTCTCCCTTTTTTGTACAGATCATG  
ACAGACCCGGATGTTCCCTGGCCCTAGTGATCCTTATCTGAGAGAGCACTTGCACTGGTACTCAATT  
ATACCATCATTTTAGTTTTATTAAACATTGCTTAAATACTTAAGCTGTAACACTAACTAACCATTTA  
TAACATAAAAGAAAAACCCACCACACCACATAGCCACTGGATTCTTTTAACAACCTCAACAAAATTT  
TTAAGATAATCATTTAAAAGTACTTAACTGTTTACCCATCTGACAATATTCACGTCAGATGTCTGTG  
TATTTTAAGCCTAATAGAAGTTTGAAGTTTACAAGATATATATGCATCCTTTCATTCCCATCCAAAA  
A

> **ON711018 [Cajanus cajan] determinate growth habit Genotype ICPL 11258 gene CcTFL1 partial cds**  
CCACATGACTGTGAGTTACAACAAGAAGCAAGTCTACAATGGCCATGAGCTCTTCCCTTCCACTGT  
CAACACCATAACCAAGGTTGAGATTGATGGTGGTGATATGAGGTCCTTCTTCACACTGGTATATAT  
GTATCTCTTCTTATATTCCCTTTTTCTTTGAAGAACAAGGGGTGAAAAAAGAAAAATTAAGCT  
GTTTTCCAGTGTGTTTCGTTTGTGTTTTCTGTAATCATGCTCACACAATCACACTATATGCCTCTTTT  
ATTGGAGTTTTCTTCAAGAGTACTGAATCATTAAAGCTAAATGTCTCCCTTTTTTGTACAGATCATG  
ACAGACCCGGATGTTCCCTGGCCCTAGTGATCCTTATCTGAGAGAGCACTTGCACTGGTACTCAATT  
ATACCATCATTTTAGTTTTATTAAACATTGCTTAAATACTTAAGCTGTAACACTAACTAACCATTTA  
TAACATAAAAGAAAAACCCACCACACCACATAGCCACTGGATTCTTTTAACAACCTCAACAAAATTT  
TTAAGATAATCATTTAAAAGTACTTAACTGTTTACCCATCTGACAATATTCACGTCAGATGTCTGTG  
TATTTTAAGCCTAATAGAAGTTTGAAGTTTACAAGATATATATGCATCCTTTCATTCCACATCTAA  
AAAGAA

> **ON711019 [Cajanus cajan] indeterminate growth habit Genotype GT 103 gene CcTFL1 partial cds**  
CCACAAGCATAAAAATGACTGTGAGTTACAACAAGAAGCAAGTCTACAATGGCCATGAGCTCTTC  
CCTTCCACTGTCAACACCATAACCAAGGTTGAGATTGATGGTGGTGATATGAGGTCCTTCTTCACA  
CTGGTATATATGTATCTCTTCTTATATTCCCTTTTTCTTTGAAGAACAAGGGGTGAAAAAAGAA  
AAAATTAAGCTGTTTTCCAGTGTGTTTCGTTTGTGTTTTCTGTAATCATGCTCACACAATCACACTA  
TATGCCTCTTTTATTGGAGTTTTCTTCAAGAGTACTGAATCATTAAAGCTAAATGTCTCCCTTTTTTGT  
CACAGATCATGACAGACCCGGATGTTCCCTGGCCCTAGTGATCCTTATCTGAGAGAGCACTTGCACT

GGTACTCAATTATAACCATCATTTTAGTTTATTAAACATTGCTTAAATACTTAAGCTGTAACACTAAA  
CTAACCATTTATAACATAAAAGAAAAACCCACCACACCACATAGCCACTGGATTCTTTTAACAAC  
CAACAAAAATTTTAAGATAATCATTTAAAGTACTTAACTGTTTACCCATCTGACAATATTCACGT  
CAGATGTCTGTGTATTTTAAGCCTAATAGAAGTTTGAAGTTTACAAGATATATATGCATCCTTTCA  
TTCACATCAAAAA

**> ON711020 [Cajanus cajan] indeterminate growth habit Genotype GT 101 gene CcTFL1 partial cds**

CCACAAGCATAAAAATGACTGTGAGTTACAACAAGAAGCAAGTCTACAATGGCCATGAGCTCTTC  
CCTTCCACTGTCAACACCATAACCAAGGTTGAGATTGATGGTGGTGATATGAGGTCCTTCTTCACA  
CTGGTATATATGTATCTCTTCTTATATTCCCTTTTCTTTGAAGAACAAAGGGGTGAAAAAAAAGAA  
AAAATTAAGCTGTTTTCCAGTGTGTTTCGTTTGTTGTTTTCTGTAATCATGCTCACACAATCACACTA  
TATGCCTCTTTTATTGGAGTTTTCTTCAAGAGTACTGAATCATTAAAGCTAAATGTCTCCCTTTTTTGT  
CACAGATCATGACAGACCCGGATGTTCTGGCCCTAGTGATCCTTATCTGAGAGAGCACTTGCACT  
GGTACTCAATTATAACCATCATTTTAGTTTATTAAACATTGCTTAAATACTTAAGCTGTAACACTAAA  
CTAACCATTTATAACATAAAAGAAAAACCCACCACACCACATAGCCACTGGATTCTTTTAACAAC  
CAACAAAAATTTTAAGATAATCATTTAAAGTACTTAACTGTTTACCCATCTGACAATATTCACGT  
CAGATGTCTGTGTATTTTAAGCCTAATAGAAGTTTGAAGTTTACAAGATATATATGCATCCTTCAT  
TCCCCATCAAAAATTA AAAA

**> ON711021 [Cajanus cajan] indeterminate growth habit Genotype P 992 gene CcTFL1 partial cds**

CCACAAGCATAAAAATGACTGTGAGTTACAACAAGAAGCAAGTCTACAATGGCCATGAGCTCTTC  
CCTTCCACTGTCAACACCATAACCAAGGTTGAGATTGATGGTGGTGATATGAGGTCCTTCTTCACA  
CTGGTATATATGTATCTCTTCTTATATTCCCTTTTCTTTGAAGAACAAAGGGGTGAAAAAAAAGAA  
AAAATTAAGCTGTTTTCCAGTGTGTTTCGTTTGTTGTTTTCTGTAATCATGCTCACACAATCACACTA  
TATGCCTCTTTTATTGGAGTTTTCTTCAAGAGTACTGAATCATTAAAGCTAAATGTCTCCCTTTTTTGT  
CACAGATCATGACAGACCCGGATGTTCTGGCCCTAGTGATCCTTATCTGAGAGAGCACTTGCACT  
GGTACTCAATTATAACCATCATTTTAGTTTATTAAACATTGCTTAAATACTTAAGCTGTAACACTAAA  
CTAACCATTTATAACATAAAAGAAAAACCCACCACACCACATAGCCACTGGATTCTTTTAACAAC  
CAACAAAAATTTTAAGATAATCATTTAAAGTACTTAACTGTTTACCCATCTGAAAATATTCACGT  
CAGATGTCTGTGTATTTTAAGCCTAATAGAAGTTTGAAGTTTACAAGATATATATGCATCC

**> ON711022 [Cajanus cajan] indeterminate growth habit Genotype AGT 2 gene CcTFL1 partial cds**

CCACAAGCATAAAAATGACTGTGAGTTACAACAAGAAGCAAGTCTACAATGGCCATGAGCTCTTC  
CCTTCCACTGTCAACACCATAACCAAGGTTGAGATTGATGGTGGTGATATGAGGTCCTTCTTCACA  
CTGGTATATATGTATCTCTTCTTATATTCCCTTTTCTTTGAAGAACAAAGGGGTGAAAAAAAAGAA  
AAAATTAAGCTGTTTTCCAGTGTGTTTCGTTTGTTGTTTTCTGTAATCATGCTCACACAATCACACTA  
TATGCCTCTTTTATTGGAGTTTTCTTCAAGAGTACTGAATCATTAAAGCTAAATGTCTCCCTTTTTTGT  
CACAGATCATGACAGACCCGGATGTTCTGGCCCTAGTGATCCTTATCTGAGAGAGCACTTGCACT  
GGTACTCAATTATAACCATCATTTTAGTTTATTAAACATTGCTTAAATACTTAAGCTGTAACACTAAA  
CTAACCATTTATAACATAAAAGAAAAACCCACCACACCACATAGCCACTGGATTCTTTTAACAAC  
CAACAAAAATTTTAAGATAATCATTTAAAGTACTTAACTGTTTACCCATCTGACAATATTCACGT

CAGATGTCTGTGTATTTTAAGCCTAATAAAAAGTTTGAAGTTTACAAGATATATATGCATCCTTTCT  
TCCCATCAAAAGCGGA

> ON711023 [*Cajanus cajan*] indeterminate growth habit Genotype UPAS 120 gene CcTFL1 partial cds  
CCACAAGCATAAAAATGACTGTGAGTTACAACAAGAAGCAAGTCTACAATGGCCATGAGCTCTTC  
CCTTCCACTGTCAACACCATAACCAAGGTTGAGATTGATGGTGGTGATATGAGGTCCTTCTTCACA  
CTGGTATATATGTATCTCTTCTTATATTCCCTTTTCTTTGAAGAACAAAGGGGTGAAAAAAAAGAA  
AAAATTAAGCTGTTTTCCAGTGTGTTTCGTTTGTGTTTTCTGTAATCATGCTCACACAATCACACTA  
TATGCCTCTTTTATTGGAGTTTTCTTCAAGAGTACTGAATCATTAAGCTAAATGTCTCCCTTTTTTGT  
CACAGATCATGACAGACCCGGATGTTCTGGCCCTAGTGATCCTTATCTGAGAGAGCACTTGCACT  
GGTACTCAATTATAACCATCATTTTAGTTTATTAAACATTGCTTAAATACTTAAGCTGTAACACTAAA  
CTAACCATTTATAACATAAAAGAAAAACCCACCACACCACATAGCCACTGGATTCTTTTAACAAC  
CAACAAAAATTTTAAAATAATCATTTAAAGTACTTAAGTGTTTACCCATCTGACAATATTCACGT  
CAGATGTCTGTGTATTTTAAGCCTAATAGAAG

>OQ540751 [*Cajanus cajanifolius*] indeterminate growth habit gene CcTFL1 partial cds  
TTCTCTCTTCTTCCTTCTTCCTCTTATAATGGCAAGAATGCCTATAGAGCCTCTAATAGTGGGAAGA  
GTCATAGGAGAAGTTCTTGATTCTTTCACCACAAGCATAAAAATGACTGTGAGTTACAACAAGAA  
GCAAGTCTACAATGGCCATGAGCTCTTCCCTTCCACTGTCAACACCGTACCCAAGGTTGAGATTGA  
TGGTGGTGATATGAGGTCCTTCTTCACACTGGTATATATGTATCTCTTCTTACTCCCTTTTCTTTGAA  
GAACAAAAGGGTGGAAAAAAGAAAAAATTAAGTGTGAGCTGTTTTCCAGTGTGTTGTTTGTGTT  
GTTTTCTGTAATCATGCTCACACAATCACACTATATGCCTCTTTTATTGGAGTTTTCTTCAAGAGTA  
CTGAATCATTAAGCTAAATGTCTCCCTTTTTTGTACAGATCATGACAGACCCGGATGTTCTGGCC  
CTAGTGATCCTTATCTGAGAGAGCACTTGCACTGGTACTCAATTATAACCATCATTTTAGTTTATTAA  
ACATTGCTTAAATACTTAAGCTGTAACACTAAAATAACCATTTATAACATAAAAGAAAAACCCACC  
ACACCACATAGCCACTGGATTCTTTTAACAACCTCAACAAAAATTTAAGATAATCATTTAAAAGTA  
CTTAAGTGTTTACCCATCTGACAATATTCACGTCAGATGTCTGTGTATTTTAAGCCTAATAGAAGTT  
TTGAAGTTTTACAAGATATATATGCATCCTTTCATCACATCAAATTAACCACTGAAGTAAATGAAG  
AAGGTACATATATACATACCTTTAATTGTATTCTGTAAAAGTAGCACGTTCTACCAAATCCATCCA  
CCCTAAAACCAAAACAATCTCAAAGGGTGAATAAATCTCGAAGTCTCAAACATAACATAATTAAC  
GGTATATATATGTAAGGTAAACTAGCCATTCTAGGTATCTAACAGTCAACAAATTTGTTGGAAT  
ATTCTTTTTTGCAGGATAGTGACAGATATTCCAGGCACAACAGATGCCACATTTGGTAGGTTTCATGT  
AAATGATTGGGATATAAAGGGAACCTTTCAACTTACTACGGATGATGAAGAAAAAAT

>OQ540752 [*Cajanus scarabaeoides*] indeterminate growth habit gene CsTFL1 complete cds  
AATTAAGCCTTCTTTCTCCTCCTTCCTTCTTCTCTTATAATGGCAAGAATGCCTATAGAGCCT  
CTAATAGTGGGAAGAGTCATAGGAGAAGTTCTTGATTCTTTCACCACAAGCATAAAAATGACTGTG  
AGTTACAACAAGAAGCAAGTCTACAATGGCCATGAGCTCTTCCCTTCCACTGTCAACACCATACCC  
AAGGTTGAGATTGATGGTGGTGATATGAGGTCCTTCTTCACACTGGTATATATGTATCTCTTCTTAT  
ATTCCCTTTTCTTTGAAGAACAAACGGGTGGAAAAAAGAAAAAATTAAGTGTGAGCTGTTTTCC  
AGTGTGTTTGTGTTGTTTCTGTAATCATGCTCACACAATCACACTATATGCCTTTTATTGGAGTT



TTCTTCAAGAGTACTGAATCATTAAAGCTAAATGTCTCCCTTTTTTGTGCAGATCATGACAGACCCG  
GATGTTCCCTGGCCCTAGTGATCCTTATCTGAGAGAGCACTTGCCTGGTACTCAATTATACCATCAT  
TTTAGTTTATTAAACATTGCTTAAATACTTAAAGCTGTAACACTAACTAACCATTTATAACATAAA  
AGAAAAACCCACCACACCACATAGCCACTGGATTCTTTGAACAACCTCAACAAAAATTTTAAGATA  
ATCATTTAAAAGTACTTAACTGTTTACCCATCTGACAATATTCACGTCAGATGTCTGTGTATTTTAA  
GCCTAATAGAAGTTTGAAGTTTACAAGATATATATGCATCCTTTCATCACATCAAATTAACCACT  
GAAGTAAATGAAGAAGGTACATATATACATACCTTTAATTGTATTCTGTAAAAGTAGCACGTTCTA  
CCAAATCCATCCACCCTAAAACCAAAACAATCTCAAAGGGTGAATAAATCTCGAAGTCTCAAACA  
TAATATAATTAACGGTATATGTAAGGTAACTAGCCATTTCATAGGTATCTAACAGTCAACAAATTT  
GTTGGAAATATTCTTTTTGCAGGATAGTGACAGATATTCCAGGCACAACAGATGCCACATTTGGTA  
GGTTCATGTAAATGATTGGTATATAAGGGAACCTTCAACTTACTACTGATGATGAGTGAGACTGAC  
AAATATGATCTATCTTGCTGTTGTAGGGAAGAGTTGGTGAGCTATGAGATCCCAAAGCCTAATAT  
TGGGATCCATAGGTTTGTGTTTGTCTGTTCAGCAAAAGCGTAGGCAGTGTGTTACTCCACCTAC  
TTCAAGGGATCACTTCAATACACGCAATTCGCCGCACAGAATGACCTTGGCCTCCCTGTGGCTGC  
TGTCTACTTCAATGCACAGAGGGAACGGCTGCAAGAAGACGCTAGCGAGCATACTTGGTGTTTG  
CTTCTGCAACCAAGGTAGTATTGAATAAAGCATTAGCGCAAACCTGCGTTGCAGGCGGT

[illegible]
